# Supplementary material for: Performance of a Deep Learning Model vs Human Reviewers in Grading Endoscopic Disease Severity of Patients With Ulcerative Colitis
Source: PubMed Central journal article supplement (PMC6537821; doi:10.1001/jamanetworkopen.2019.3963), 2019-05-17
Supplement: jamanetwopen-2-e193963-s001.pdf [file jamanetwopen-2-e193963-s001.pdf]

## Supplementary Online Content

Stidham RW, Liu W, Bishu S, et al. Performance of a deep learning model vs human reviewers in grading endoscopic disease severity of patients with ulcerative colitis. *JAMA Netw Open*. 2019;2(5):e193963. doi:10.1001/jamanetworkopen.2019.3963

**eMethods.** Expanded Description of Patient Inclusion and Exclusion Criteria

**eTable 1.** Study Cohort Characteristics

**eTable 2.** Agreement Between Adjudicated Human Reference Scores and Automated Mayo Subscore Using Images From Colonoscopy Videos

This supplementary material has been provided by the authors to give readers additional information about their work.

## eMethods. Expanded Description of Patient Inclusion and Exclusion Criteria

### 1. Inclusion Criteria

Study inclusion criteria required two ICD-9 or ICD-10 diagnosis codes for UC on two separate encounters and at least one record of UC medication use.

#### a. *Ulcerative Colitis Diagnosis Codes*

| <b>ICD-9 Code</b>  | <b>Description</b>                      |
|--------------------|-----------------------------------------|
| 556                | Ulcerative (chronic) enterocolitis      |
| 556.1              | Ulcerative (chronic) ileocolitis        |
| 556.2              | Ulcerative (chronic) proctitis          |
| 556.3              | Ulcerative (chronic) proctosigmoiditis  |
| 556.5              | Left-sided ulcerative (chronic) colitis |
| 556.6              | Universal ulcerative (chronic) colitis  |
| 556.8              | Other ulcerative colitis                |
| 556.9              | Ulcerative colitis, unspecified         |
|                    |                                         |
| <b>ICD-10 Code</b> | <b>Description</b>                      |
| K51.0x             | Ulcerative (chronic) pancolitis         |
| K51.2x             | Ulcerative (chronic) proctitis          |
| K51.3x             | Ulcerative (chronic) rectosigmoiditis   |
| K51.5x             | Left sided colitis                      |
| K51.8x             | Other ulcerative colitis                |
| K51.9x             | Ulcerative colitis, unspecified         |

#### b. *Ulcerative Colitis Medications*

|                                  |
|----------------------------------|
| <b><u>5-Aminosalicylates</u></b> |
| mesalamine                       |
| sulfasalazine                    |
| balsalazide                      |
| olsalazine                       |
|                                  |
| <b><u>Corticosteroids</u></b>    |
| prednisone                       |
| budesonide                       |
|                                  |
| <b><u>Immunomodulators</u></b>   |
| azathioprine                     |
| mercaptopurine                   |
| methotrexate                     |

|                       |
|-----------------------|
| cyclosporine          |
| mycophenolate mofetil |
| tacrolimus            |
|                       |
| <b>Biologics</b>      |
| infliximab            |
| adalimumab            |
| golimumab             |
| vedolizumab           |

## 2. Exclusion Criteria

We excluded any patients with ICD-9 or ICD-10 diagnosis codes for Crohn’s disease or a CPT code prior to colonoscopy date indicating colectomy, ileoanal pouch anastomosis, colostomy, ileostomy, or other bowel resection.

### a. Crohn’s Disease

| ICD-9 Code  | Description                                                                   |
|-------------|-------------------------------------------------------------------------------|
| 555         | Regional enteritis of small intestine                                         |
| 555.1       | Regional enteritis of large intestine                                         |
| 555.2       | Regional enteritis of small intestine with large intestine                    |
| 555.9       | Regional enteritis of unspecified site                                        |
|             |                                                                               |
| ICD-10 Code | Description                                                                   |
| K50.00x     | Crohn’s disease of small intestine without complications                      |
| K50.011x    | Crohn’s disease of small intestine with rectal bleeding                       |
| K50.012x    | Crohn’s disease of small intestine with intestinal obstruction                |
| K50.013x    | Crohn’s disease of small intestine with fistula                               |
| K50.014x    | Crohn’s disease of small intestine with abscess                               |
| K50.018x    | Crohn’s disease of small intestine with other complication                    |
| K50.019x    | Crohn’s disease of small intestine with unspecified complications             |
| K50.10x     | Crohn’s disease of large intestine without complications                      |
| K50.111x    | Crohn’s disease of large intestine with rectal bleeding                       |
| K50.112x    | Crohn’s disease of large intestine with intestinal obstruction                |
| K50.113x    | Crohn’s disease of large intestine with fistula                               |
| K50.114x    | Crohn’s disease of large intestine with abscess                               |
| K50.118x    | Crohn’s disease of large intestine with other complication                    |
| K50.119x    | Crohn’s disease of large intestine with unspecified complications             |
| K50.80x     | Crohn’s disease of both small and large intestine without complications       |
| K50.811x    | Crohn’s disease of both small and large intestine with rectal bleeding        |
| K50.812x    | Crohn’s disease of both small and large intestine with intestinal obstruction |
| K50.813x    | Crohn’s disease of both small and large intestine with fistula                |

|          |                                                                                  |
|----------|----------------------------------------------------------------------------------|
| K50.814x | Crohn's disease of both small and large intestine with abscess                   |
| K50.818x | Crohn's disease of both small and large intestine with other complication        |
| K50.819x | Crohn's disease of both small and large intestine with unspecified complications |
| K50.90x  | Crohn's disease, unspecified, without complications                              |
| K50.911x | Crohn's disease, unspecified, with rectal bleeding                               |
| K50.912x | Crohn's disease, unspecified, with intestinal obstruction                        |
| K50.913x | Crohn's disease, unspecified, with fistula                                       |
| K50.914x | Crohn's disease, unspecified, with abscess                                       |
| K50.918x | Crohn's disease, unspecified, with other complication                            |
| K50.919x | Crohn's disease, unspecified, with unspecified complications                     |

*b. Surgical CPT Procedure Codes*

Procedure codes captured colectomy (total or partial), colostomy, ileostomy, J-pouch or other reservoir procedure. The 2018 NHSN Operative Procedure Code Mapping Tables, maintained by the United States Centers for Disease Control, were used for CPT code reference.

| <b><u>CPT Code</u></b> | <b><u>Description</u></b>                                                                                |
|------------------------|----------------------------------------------------------------------------------------------------------|
| 44139                  | Mobilization (take-down) of splenic flexure performed in conjunction with partial colectomy              |
| 44140                  | Colectomy, partial; with anastomosis                                                                     |
| 44141                  | Colectomy, partial; with skin level cecostomy or colostomy                                               |
| 44143                  | Colectomy, partial; with end colostomy and closure of distal segment (Hartmann type procedure)           |
| 44144                  | Colectomy, partial; with resection, with colostomy or ileostomy and creation of mucofistula              |
| 44145                  | Colectomy, partial; with coloproctostomy (low pelvic anastomosis)                                        |
| 44146                  | Colectomy, partial; with coloproctostomy (low pelvic anastomosis), with colostomy                        |
| 44147                  | Colectomy, partial; abdominal and transanal approach                                                     |
| 44150                  | Colectomy, total; abdominal, without proctectomy; with ileostomy or ileoproctostomy                      |
| 44151                  | Colectomy, total; abdominal, without proctectomy; with continent ileostomy                               |
| 44155                  | Colectomy, total; abdominal, with proctectomy; with ileostomy                                            |
| 44156                  | Colectomy, total; abdominal, with proctectomy; with continent ileostomy                                  |
| 44157                  | Colectomy, total; abdominal, without proctectomy; with ileoanal anastomosis, includes loop ileostomy     |
| 44158                  | Colectomy, total; abdominal, without proctectomy; with ileoanal anastomosis, creation of ileal reservoir |
| 44160                  | Colectomy, partial; with removal of terminal ileum with ileocolostomy \$1,295                            |
| 44320                  | Colostomy or skin level cecostomy                                                                        |
| 44322                  | Colostomy or skin level cecostomy; with multiple biopsies                                                |
| 45110                  | Proctectomy; complete, combined abdominoperineal, with colostomy                                         |
| 45111                  | Proctectomy; partial resection of rectum, transabdominal approach                                        |
| 45112                  | Proctectomy, combined abdominoperineal, pull-through procedure                                           |

|       |                                                                                                                                                                                                         |
|-------|---------------------------------------------------------------------------------------------------------------------------------------------------------------------------------------------------------|
| 45113 | Proctectomy, partial, with rectal mucosectomy, ileoanal anastomosis, creation of ileal reservoir                                                                                                        |
| 45114 | Proctectomy, partial, with anastomosis; abdominal and transsacral approach                                                                                                                              |
| 45119 | Proctectomy, combined abdominoperineal pull-through procedure (eg, colo-anal anastomosis), with creation of colonic reservoir (eg, J-pouch), with diverting enterostomy when performed                  |
| 45120 | Proctectomy, complete (for congenital megacolon), abdominal and perineal approach; with pull-through                                                                                                    |
| 45121 | Proctectomy, complete (for congenital megacolon), abdominal and perineal approach                                                                                                                       |
| 45123 | Proctectomy, partial, without anastomosis, perineal approach                                                                                                                                            |
| 45399 | Unlisted procedure, colon                                                                                                                                                                               |
| 44320 | Under Enterostomy-External Fistulization of Intestines Procedures                                                                                                                                       |
| 44204 | Laparoscopy, surgical; colectomy, partial, with anastomosis                                                                                                                                             |
| 44205 | Laparoscopy, surgical; colectomy, partial, with removal of terminal ileum with ileocolostomy                                                                                                            |
| 44206 | Laparoscopy, surgical; colectomy, partial, with end colostomy and closure of distal segment (Hartmann type procedure)                                                                                   |
| 44207 | Laparoscopy, surgical; colectomy, partial, with anastomosis, with coloproctostomy (low pelvic anastomosis)                                                                                              |
| 44208 | Laparoscopy, surgical; colectomy, partial, with anastomosis, with coloproctostomy (low pelvic anastomosis) with colostomy                                                                               |
| 44210 | Laparoscopy, surgical; colectomy, total, abdominal, without proctectomy, with ileostomy or ileoproctostomy                                                                                              |
| 44211 | Laparoscopy, surgical; colectomy, total, abdominal, with proctectomy, with ileoanal anastomosis, creation of ileal reservoir (S or J), with loop ileostomy, includes rectal mucosectomy, when performed |
| 44212 | Laparoscopy, surgical; colectomy, total, abdominal, with proctectomy, with ileostomy                                                                                                                    |
| 45136 | Excision of ileoanal reservoir with ileostomy                                                                                                                                                           |
| 44314 | Revision of ileostomy; complicated (reconstruction in-depth) (separate procedure)                                                                                                                       |
| 44316 | Continent ileostomy (Kock procedure) (separate procedure)                                                                                                                                               |
| 44310 | Ileostomy or jejunostomy, non-tube                                                                                                                                                                      |
| 44312 | Revision of ileostomy; simple (release of superficial scar) (separate procedure)                                                                                                                        |

**eTable 1. Study Cohort Characteristics**

|                             |      |            |
|-----------------------------|------|------------|
| Age, median years (IQR)     | 41.3 | 26.1, 61.8 |
| Gender, male                | 1404 | 45.6%      |
|                             |      |            |
| <b>Race</b>                 |      |            |
| White                       | 2720 | 88.3%      |
| African American            | 163  | 5.3%       |
| Asian                       | 102  | 3.3%       |
| Pacific Islander            | 33   | 1.1%       |
| Native American             | 6    | 0.2%       |
| Unreported                  | 59   | 1.9%       |
|                             |      |            |
| <b>Ethnicity</b>            |      |            |
| Non-Hispanic                | 2784 | 90.3%      |
| Hispanic                    | 168  | 5.5%       |
| Unreported                  | 130  | 4.2%       |
|                             |      |            |
| Smoking History             | 942  | 30.6%      |
|                             |      |            |
| <b>Medication Exposure*</b> |      |            |
| Mesalamine                  | 2275 | 73.8%      |
| Thiopurine                  | 907  | 29.4%      |
| Methotrexate                | 105  | 3.4%       |
| Infliximab                  | 509  | 16.5%      |
| Adalimumab                  | 434  | 14.1%      |
| Vedolizumab                 | 175  | 5.7%       |

\*Percentages do not add up to 100% due to overlap in medication use

**eTable 2. Agreement Between Adjudicated Human Reference Scores and Automated Mayo Subscore Using Images From Colonoscopy Videos**

| HUMAN Mayo Score             | PREDICTED Mayo Score, % |             |             |             | Human Total ( <i>n</i> ) |
|------------------------------|-------------------------|-------------|-------------|-------------|--------------------------|
|                              | 0                       | 1           | 2           | 3           |                          |
| 0                            | <b>75.3</b>             | 20.6        | 3.1         | 1.0         | 8143                     |
| 1                            | 12.7                    | <b>67.6</b> | 18.9        | 0.7         | 1578                     |
| 2                            | 1.9                     | 15.9        | <b>64.3</b> | 18.0        | 1123                     |
| 3                            | 2.5                     | 2.0         | 27.6        | <b>67.9</b> | 648                      |
| Predicted Total ( <i>n</i> ) | 6370                    | 2934        | 1451        | 737         | 11,492                   |

Increasing Mayo endoscopic scores denote increasing mucosal inflammation in the colon, where a score of 0 indicates normal appearing colonic mucosa and 3 indicates severe inflammatory changes.
